# Supplementary material
Source: PubMed Central journal article supplement (PMC6015866)

1  
2  
3  
4  
5  
6  
7  
8  
9  
10  
11  
12  
13  
14  
15  
16  
17  
18  
19  
20  
21  
22  
23  
24

**Electronic Supplementary Material**

**Thorley et al. (2018) Reproduction triggers adaptive increases in body size  
in female mole-rats**

**Details of the study population**

In addressing the principle aims of the study we used information from several different sources, including X-ray data from both captive and wild Damaraland mole-rats. The Damaraland mole-rat is a subterranean cooperative breeder that inhabits the red arenosols of the Kalahari in groups of 2-41 individuals (Jarvis and Bennett 1993). Our study population is located around the Kuruman River Reserve in the Northern Cape of South Africa (S26.98706° E21.81229°). A captive population was founded at this location using animals sourced from the local population between February and September 2013, and these founding animals were either maintained in their original group or selected to create new groups, achieved through the pairing of a nonbreeding female with a nonbreeding male. Groups are housed in artificial tunnel systems constructed of PVC pipes and are provided *ad libitum* access to sweet potato and cucumber (additional details of the study system and animal husbandry can be found in Zöttl et al. 2016). The captive animals from which X-rays were taken therefore represent animals that were initially caught in the wild and were brought into captivity, or the lab-born offspring of wild-caught animals.

We also took X-rays from individuals living permanently in the local wild population where a long-term mark recapture study is ongoing. Groups were trapped periodically (6 or 12-month intervals) using modified Hickman traps that were positioned into tunnel systems by digging. Traps were baited with sweet potato. After trap setting, traps were checked every 2-3

25 hours throughout the day and night. On capture, animals were placed into a closed, sand-filled  
26 box with other group members, and provided food and shelter. Intermittently, individuals were  
27 transported back to the laboratory where they were X-rayed, weighed, and had their total body  
28 length measured manually. Two people measured body length from the front of the snout to  
29 the tip of the tail to an accuracy of 1mm using a tape measure. Total body length was taken as  
30 the average of the two measures; the human measurement of body length is referred to as ‘Total  
31 body length’ to distinguish it from the ‘Skeletal body length’ measured from X-rays (below).  
32 When transporting animals from the field to the lab, traps were temporarily disabled to prevent  
33 individuals being kept in the traps for long periods. After sampling, groups were housed  
34 temporarily in tunnel systems in the laboratory (see methods below), and once a whole group  
35 was captured, as evidenced by an absence of activity for 24hrs, the animals were all returned  
36 to their natural burrow system.

37

38

39

40

41

42

43

44

45

46

47 **Figures and Tables**

48 **Table S1. Proportional trait contributions (a) and trait loadings (b) to the first five principal**  
 49 **components from a PCA of skeletal measures in captive adult female mole-rats (> 100g)**

50 **a) Proportional Contribution**

| Trait                | PC1   | PC2   | PC3   | PC4   | PC5   |
|----------------------|-------|-------|-------|-------|-------|
| Rostrum              | 3.4   | 0.42  | 11.94 | 0.98  | 20.6  |
| Ulna                 | 6.99  | 1.86  | 2.69  | 8.86  | 8.14  |
| L5 Vertebra          | 15.74 | 26.35 | 1.08  | 12.66 | 27.97 |
| Pelvic Girdle        | 10.75 | 22    | 18.39 | 24.72 | 20.21 |
| Pelvis Length        | 6.02  | 0.04  | 40.93 | 39.57 | 11.19 |
| Femur Length         | 31.43 | 41.89 | 16.31 | 2.12  | 3.81  |
| Tibia Length         | 6.54  | 2.3   | 1.55  | 5.45  | 0.18  |
| Skeletal Body Length | 10.41 | 4.83  | 1.99  | 4.31  | 0     |
| Skull Width          | 8.72  | 0.3   | 5.14  | 1.33  | 7.88  |

51

52 **b) Trait Loadings**

| Trait                | PC1    | PC2     | PC3     | PC4     | PC5     |
|----------------------|--------|---------|---------|---------|---------|
| Rostrum              | 0.0271 | -0.0058 | 0.0252  | 0.0065  | 0.0247  |
| Ulna                 | 0.0389 | -0.0123 | 0.0119  | 0.0195  | 0.0153  |
| L5 Vertebra          | 0.0584 | 0.0463  | -0.0075 | 0.0232  | -0.0285 |
| Pelvic Girdle        | 0.0483 | 0.0423  | -0.0313 | -0.0325 | 0.0242  |
| Pelvis Length        | 0.0361 | 0.0019  | 0.0466  | -0.0411 | -0.018  |
| Femur Length         | 0.0825 | -0.0583 | -0.0294 | -0.0095 | -0.0105 |
| Tibia Length         | 0.0377 | -0.0137 | 0.0091  | 0.0153  | 0.0023  |
| Skeletal Body Length | 0.0475 | 0.0198  | 0.0102  | 0.0135  | 0.0005  |
| Skull Width          | 0.0435 | 0.0049  | 0.0166  | 0.0076  | 0.0146  |

53

54

55

56

57

58

59

60

61

62

63

64

65 Table S2. Bivariate scaling relationships of skeletal size measures in captive female mole-rats;  
66 SBL = Skeletal Body Length. SW = Skull Width. All linear traits were log-transformed. Bold,  
67 underlined terms represent slopes that differ significantly at  $\alpha = 0.05$  (\*), 0.01 (\*\*), 0.001 (\*).  
68 Significantly different slopes were determined by the interaction between Trait<sub>2</sub> and Class.  
69 Significantly different intercepts are taken from the model including the interaction if it was  
70 significant, otherwise they derive from a simpler model in which the interaction term was  
71 removed. Note that the difference in intercepts for relationships with an interaction are estimated  
72 at length zero, so they lie outside the bounds of the data. Difference in intercepts represent an in-  
73 group nonbreeder relative to the queen. Note that total head width here refers to the skull width  
74 as measured on the anaesthetised animal with digital callipers (i.e. not from X-rays).

75

| Trait <sub>1</sub>                | Trait <sub>2</sub> | $\beta$ Queen | $\beta$ nonbreeder | diff Slopes       | diff Intercept     |
|-----------------------------------|--------------------|---------------|--------------------|-------------------|--------------------|
| Rostrum Length                    | SBL                | 0.561 ± 0.161 | 0.594 ± 0.189      | 0.033, n.s.       | 0.013, n.s.        |
| <b><u>Ulna</u></b>                | SBL                | 0.314 ± 0.154 | 0.774 ± 0.181      | <b>0.460, *</b>   | <b>-2.26, *</b>    |
| <b><u>L5 Vertebra</u></b>         | SBL                | 0.586 ± 0.160 | 0.912 ± 0.189      | 0.326, n.s.       | <b>-0.112, ***</b> |
| <b><u>Pelvic Girdle Width</u></b> | SBL                | 0.205 ± 0.238 | 0.566 ± 0.281      | 0.362, n.s.       | <b>-0.076, ***</b> |
| Pelvis Length                     | SBL                | 0.619 ± 0.234 | 0.627 ± 0.276      | 0.008, n.s.       | 0.018, n.s.        |
| Femur Length                      | SBL                | 0.490 ± 0.334 | 1.039 ± 0.394      | 0.549, n.s.       | 0.017, n.s.        |
| Tibia Length                      | SBL                | 0.449 ± 0.148 | 0.625 ± 0.174      | 0.176, n.s.       | 0.001, n.s.        |
| <b><u>Skull Arch</u></b>          | SBL                | 0.510 ± 0.116 | 0.914 ± 0.137      | <b>0.404, **</b>  | <b>-1.99, **</b>   |
| <b><u>Head Width</u></b>          | SBL                | 0.402 ± 0.216 | 1.281 ± 0.254      | <b>0.880, ***</b> | <b>-4.31, ***</b>  |
| <b><u>Weight</u></b>              | SBL                | 0.424 ± 0.120 | 0.951 ± 0.014      | <b>0.527, ***</b> | <b>-2.60, ***</b>  |
| Rostrum Length                    | SW                 | 0.566 ± 0.172 | 0.557 ± 0.196      | -0.009, n.s.      | 0.012, n.s.        |
| Ulna                              | SW                 | 0.730 ± 0.144 | 0.689 ± 0.163      | 0.041, n.s.       | 0.012, n.s.        |
| <b><u>L5 Vertebra</u></b>         | SW                 | 0.228 ± 0.193 | 0.756 ± 0.219      | <b>0.530, *</b>   | <b>-1.89, *</b>    |
| <b><u>Pelvic Girdle Width</u></b> | SW                 | 0.420 ± 0.251 | 0.548 ± 0.285      | 0.129, n.s.       | <b>-0.076, ***</b> |
| Pelvis Length                     | SW                 | 0.381 ± 0.248 | 0.681 ± 0.282      | 0.300, n.s.       | 0.018, n.s.        |
| Femur Length                      | SW                 | 0.457 ± 0.354 | 1.015 ± 0.402      | 0.559, n.s.       | 0.017, n.s.        |
| Tibia Length                      | SW                 | 0.482 ± 0.155 | 0.601 ± 0.177      | 0.119, n.s.       | 0.001, n.s.        |
| <b><u>Head Width</u></b>          | SW                 | 1.257 ± 0.187 | 1.261 ± 0.212      | 0.004, n.s.       | <b>0.056, ***</b>  |
| Weight                            | SW                 | 0.749 ± 0.115 | 0.883 ± 0.131      | 0.134, n.s.       | 0.001, n.s.        |

76

**Table S3. Full model outputs for linear mixed effects models exploring the influence of body length on three fitness: a) Litter size, Poisson errors) b) Total neonate mass, normal errors c) Individual pup mass, normal errors. Significance of fixed covariates were estimated from likelihood ratio tests comparing models with and without the fixed effect of interest.**

|                               | Fixed Terms       |          |                |                       | Random Terms      |          |          |                    |
|-------------------------------|-------------------|----------|----------------|-----------------------|-------------------|----------|----------|--------------------|
|                               | Term              | Estimate | Standard Error | LRT<br>( $\chi^2_1$ ) | p value           | Term     | Variance | Standard Deviation |
| <b>a) Litter Size</b>         | Intercept         | -1.06    | 0.92           |                       |                   | Mother   | 0        |                    |
|                               | Total Body Length | 0.12     | 0.05           | 5.81                  | <b>0.016</b>      |          |          |                    |
|                               | Primiparity (YES) | -0.3     | 0.17           | 3.57                  | 0.059             |          |          |                    |
| <b>b) Total Neonate Mass</b>  | Intercept         | -39.52   | 23.02          |                       |                   | Mother   | 37.7     | 6.1                |
|                               | Total Body Length | 3.83     | 1.23           | 8.89                  | <b>0.003</b>      | Residual | 82.49    | 9.1                |
|                               | Primiparity (YES) | -5.65    | 2.52           | 5.05                  | <b>0.025</b>      |          |          |                    |
| <b>c) Individual Pup Mass</b> | Intercept         | 5.25     | 3.17           |                       |                   | Mother   | 0.81     | 0.9                |
|                               | Total Body Length | 0.36     | 0.17           | 4.12                  | <b>0.040</b>      | Litter   | 0.84     | 0.92               |
|                               | Primiparity (Y)   | 0.45     | 0.33           | 1.77                  | 0.183             | Residual | 1.24     | 1.11               |
|                               | Litter Size       | -0.6     | 0.08           | 47.76                 | <b>&lt; 0.001</b> |          |          |                    |

1 **Figure S1 – Bimonthly change in a) L5 lumbar vertebra and b) Skull width of captive females**  
 2 **experimentally manipulated to follow different social trajectories.**

3

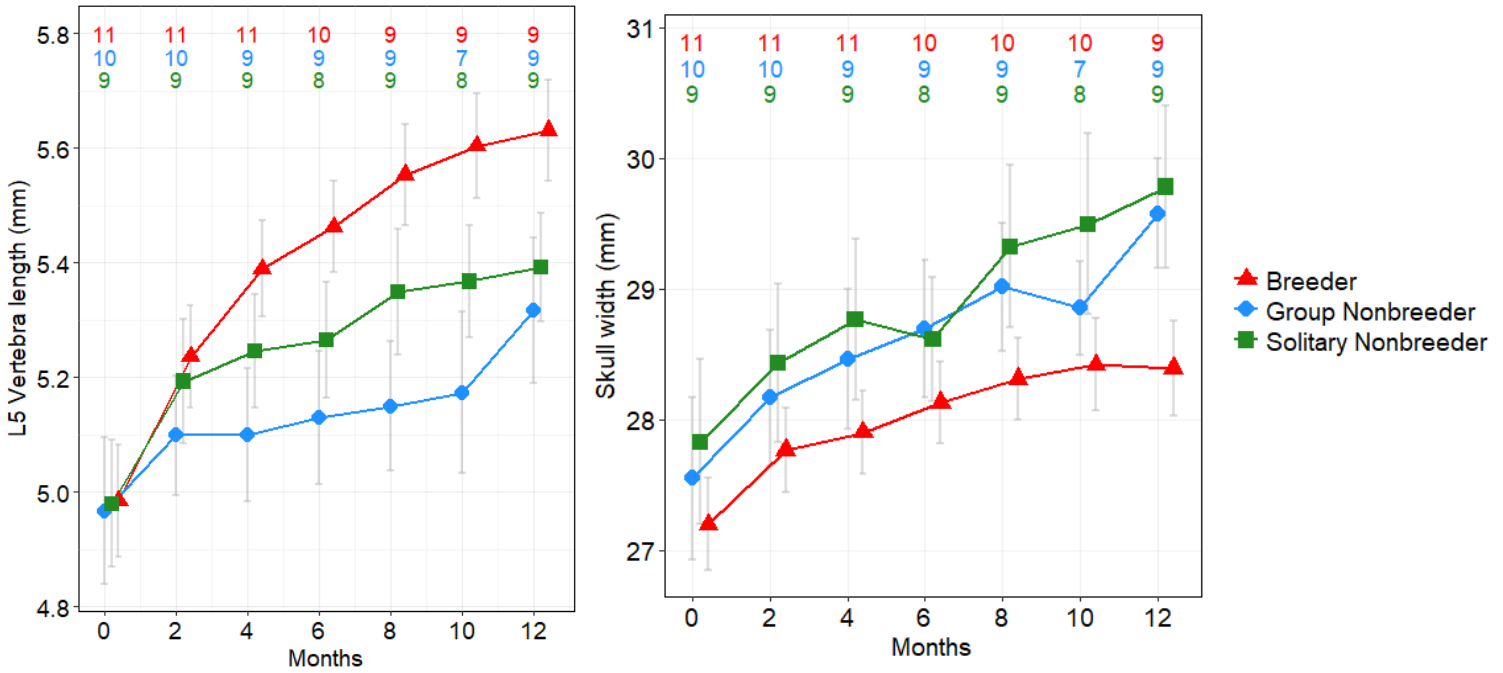

4

5

6

7 **Figure S2 – Growth of L4 (a) and L6 (b) vertebrae of captive female mole-rats experimentally**  
 8 **manipulated to follow different social trajectories.**

9

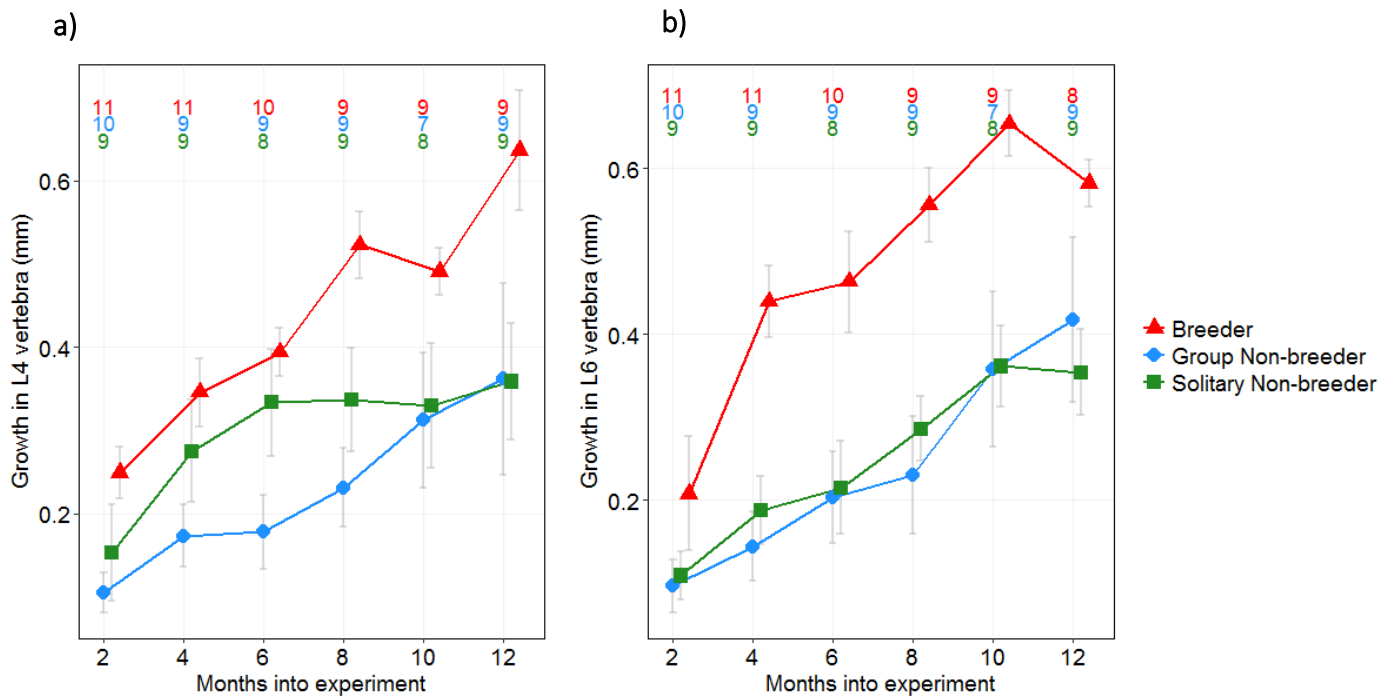

Supplement: rspb20180897supp1.pdf [file rspb20180897supp1.pdf]
